# Supplementary material for: Biosynthesis of zinc oxide nanoparticles via neem extract and their anticancer and antibacterial activities
Source: PeerJ. 2024 Jun 25;12:e17588. doi: 10.7717/peerj.17588 (PMC11212640; doi:10.7717/peerj.17588)
Supplement: Supplemental Information 1 [file peerj-12-17588-s001.xlsx]

## Sheet: A 549
													Statstical analysis							mRNA fold change			Statstical analysis
							A 549		Cell viability	Toxicity				Cell viability	± SE	Toxicity			Replicates	A 549	HCt-116		mRNA fold change
						Neem	31.25	R1	98.53	1.47		Neem	31.25	98.54	0.011	1.46	0.023	Control	R1	1	1		A 549	± SE	Duncan	HCT-116	± SE	Duncan
								R2	98.5	1.5			62.5	98.5	0.05	1.5	0.011		R2	1	1	Control	1	0	d	1	0	d
								R3	98.58	1.42			125	98.39	0.008	1.61	0.011		R3	1	1	Neem	3.34	0.011	c	4.24	0.014	c
							62.5	R1	98.5	1.5			250	97.52	0.011	2.48	0.008	Neem	R1	3.32	4.21	ZnO-NPs	5.4	0.011	b	5.74	0.005	b
								R2	98.48	1.52			500	97.1	0.11	2.9	0.05		R2	3.34	4.24	ZnO-NPs green	7.14	0.014	a	7.53	0.008	a
								R3	98.52	1.48			1000	47.1	0.023	52.9	0.11		R3	3.36	4.26
							125	R1	98.37	1.63				Cell viability	± SE	Toxicity		ZnO-NPs	R1	5.43	5.76
								R2	98.39	1.61		ZnO-NPs	31.25	100	0	0	0		R2	5.38	5.74
								R3	98.41	1.59			62.5	99.7	0.05	0.3	0.05		R3	5.41	5.73
							250	R1	97.5	2.5			125	63.39	0.01	36.61	0.01	ZnO-NPs green	R1	7.12	7.54
								R2	97.53	2.47			250	33.6	0.11	66.4	0.11		R2	7.14	7.52
								R3	97.52	2.48			500	14.5	0.11	85.5	0.11		R3	7.16	7.53
							500	R1	97.1	2.9			1000	6	0.05	94	0.05
								R2	97	3				Cell viability	± SE	Toxicity
								R3	97.2	2.8		ZnO-NPs green	31.25	98.59	0.017	1.41	0.017
							1000	R1	47.1	52.9			62.5	79.92	0.011	20.08	0.011
								R2	47.3	52.7			125	37.62	0.011	62.38	0.011
								R3	46.9	53.1			250	23.92	0.008	76.08	0.008
						ZnO-NPs	31.25	R1	100	0			500	8.32	0.005	91.68	0.005
								R2	100	0			1000	5.22	0.005	94.78	0.005
								R3	100	0
							62.5	R1	99.7	0.3
								R2	99.8	0.2
								R3	99.6	0.4
							125	R1	63.39	36.61
								R2	63.37	36.63
								R3	63.41	36.59
							250	R1	33.6	66.4
								R2	33.4	66.6
								R3	33.8	66.2
							500	R1	14.5	85.5
								R2	14.7	85.3
								R3	14.3	85.7
							1000	R1	6	94
								R2	6.1	93.9
								R3	5.9	94.1
						ZnO-NPs green	31.25	R1	98.59	1.41
								R2	98.56	1.44
								R3	98.62	1.38
							62.5	R1	79.92	20.08
								R2	79.9	20.1
								R3	79.94	20.06
							125	R1	37.62	62.38
								R2	37.6	62.4
								R3	37.64	62.36
							250	R1	23.93	76.07
								R2	23.91	76.09
								R3	23.94	76.06
							500	R1	8.33	91.67
								R2	8.31	91.69
								R3	8.32	91.68
							1000	R1	5.22	94.78
								R2	5.21	94.79
								R3	5.23	94.77

## Sheet: HCT 116
	HCT-116		Cell viability	Toxicity
Neem	31.25	R1	99.4792	0.520833
		R2	99.53	0.47				Statstical analysis
		R3	99.5	0.5					Cell viability	duncan	± SE	Toxicity	± SE	Duncan
	62.5	R1	99.1319	0.868056			Neem	31.25	99.5	a	0.014	0.5	0.014	E
		R2	99.15	0.85				62.5	99.14	b	0.008	0.86	0.008	D
		R3	99.16	0.84				125	98.74	c	0.03	1.26	0.003	C
	125	R1	98.7847	1.21528				250	98.67	c	0.015	1.33	0.014	C
		R2	98.76	1.24				500	95.8	d	0.014	4.2	0.015	B
		R3	98.68	1.32				1000	68.26	e	0.03	31.74	0.03	A
	250	R1	98.6979	1.30208					Cell viability		± SE	Toxicity
		R2	98.66	1.34			ZnO-NPs	31.25	98.52	a	0.005	1.48	0.005	F
		R3	98.65	1.35				62.5	92.27	b	0.006	7.73	0.006	E
	500	R1	95.8333	4.16667				125	66.51	c	0.011	33.49	0.011	D
		R2	95.8	4.2				250	30.31	d	0.008	69.69	0.008	C
		R3	95.78	4.22				500	17.12	e	0.012	82.88	0.012	B
	1000	R1	68.2292	31.7708				1000	7.75	f	0.008	92.25	0.008	A
		R2	68.23	31.77					Cell viability		± SE	Toxicity
		R3	68.32	31.68			ZnO-NPs green	31.25	99.66	a	0.008	0.34	0.008	F
ZnO-NPs	31.25	R1	98.5243	1.47569				62.5	75.93	b	0.008	24.07	0.008	E
		R2	98.51	1.49				125	44.2	c	0.014	55.8	0.014	D
		R3	98.53	1.47				250	29.96	d	0.008	70.04	0.008	C
	62.5	R1	92.2743	7.72569				500	14.43	e	0.011	85.57	0.001	B
		R2	92.29	7.71				1000	7.65	f	0.008	92.35	0.008	A
		R3	92.27	7.73
	125	R1	66.4931	33.5069
		R2	66.51	33.49
		R3	66.53	33.47
	250	R1	30.2951	69.7049
		R2	30.33	69.67
		R3	30.32	69.68
	500	R1	17.1007	82.8993
		R2	17.13	82.87
		R3	17.14	82.86
	1000	R1	7.72569	92.2743
		R2	7.76	92.24
		R3	7.75	92.25
ZnO-NPs green	31.25	R1	99.6528	0.347222
		R2	99.67	0.33
		R3	99.68	0.32
	62.5	R1	75.9549	24.0451
		R2	75.93	24.07
		R3	75.92	24.08
	125	R1	44.184	55.816
		R2	44.21	55.79
		R3	44.23	55.77
	250	R1	29.9479	70.0521
		R2	29.97	70.03
		R3	29.98	70.02
	500	R1	14.4097	85.5903
		R2	14.43	85.57
		R3	14.45	85.55
	1000	R1	7.63889	92.3611
		R2	7.65	92.35
		R3	7.67	92.33
